# Supplementary material
Source: PubMed Central journal article supplement (PMC4507335)
Supplement: JB.00279-15_zjb999093695so1.pdf [file JB.00279-15_zjb999093695so1.pdf]

**A**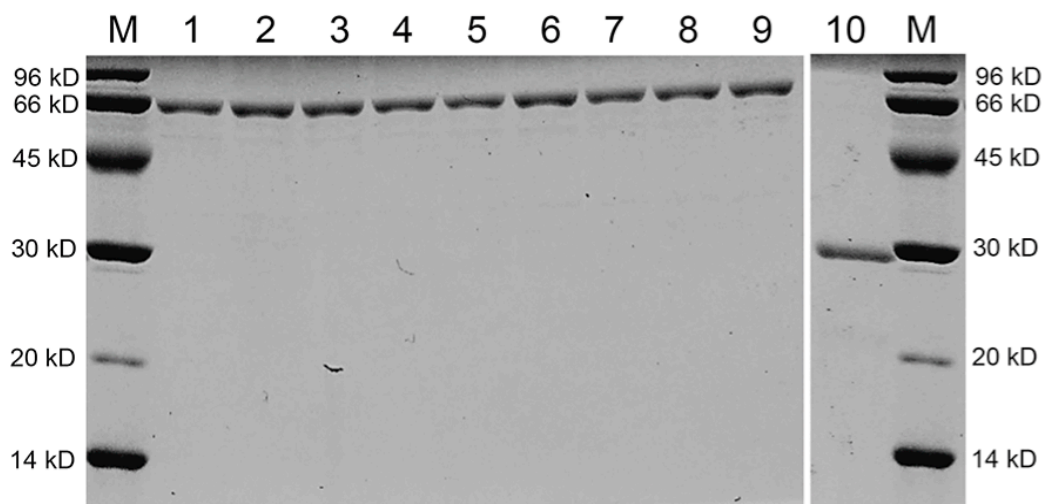**B**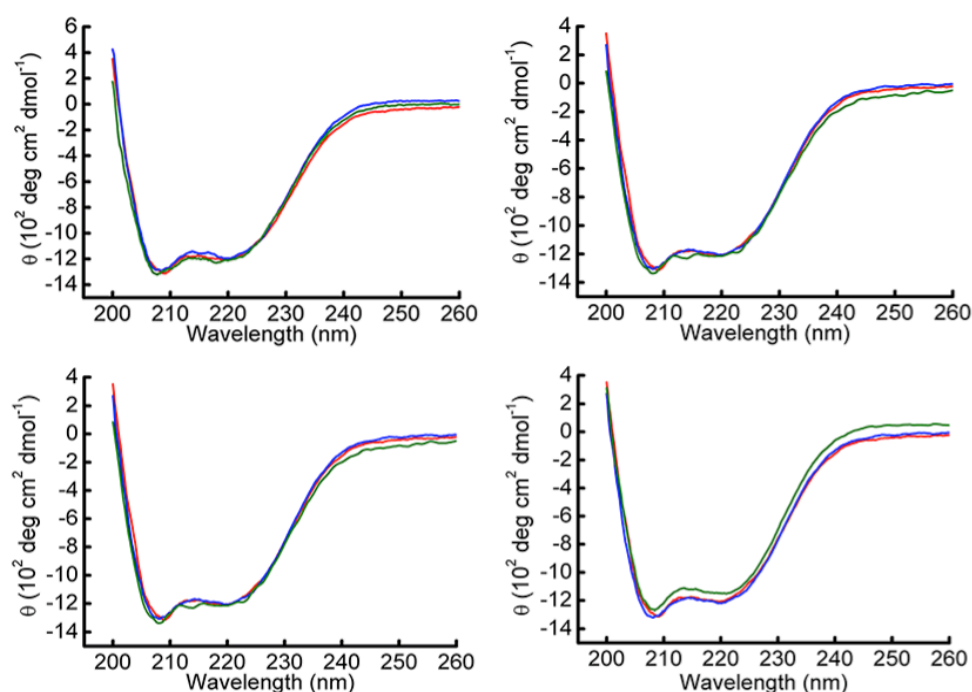

**SUPPLEMENTAL FIGURE 1. SDS-PAGE of purified recombinant proteins and the secondary structure of variant chaperonins.**

(A) SDS-PAGE gel showing purified recombinant proteins. Lane M, molecular mass markers (phosphorylase b, 97,000 Da; albumin, 66,000 Da; ovalbumin, 45,000 Da; carbonic anhydrase, 30,000 Da; trypsin inhibitor, 20,100 Da;  $\alpha$ -lactalbumin, 14,400 Da); lane 1, CpkA (5  $\mu$ g); lane 2, CpkA-E530G (5  $\mu$ g); lane 3, CpkA-E530M (5  $\mu$ g); lane 4, CpkA-Q533G (5  $\mu$ g); lane 5, CpkA-Q533M (5  $\mu$ g); lane 6, CpkA-P538G (5  $\mu$ g); lane 7, CpkA-P538M (5  $\mu$ g); lane 8, CpkA-D545G (5  $\mu$ g); lane 9, CpkA-D545M (5  $\mu$ g); lane 10, purified TrpC<sub>TK</sub> (5  $\mu$ g). (B) Far-UV CD spectra of variant chaperonins. In each frame, CpkA is represented by a red line, while Gly substitutions (E530G, Q533G, P538G, and D545G) and Met substitutions (E530M, Q533M, P538M, and D545M) are represented by blue and green lines, respectively. CD spectra of chaperonins were obtained at 20°C in 25 mM Tris-HCl (pH 7.8) containing 300 mM KCl.
